Review

# TGF- $\beta_1$ and angiotensin networking in cardiac remodeling

Stephan Rosenkranz\*

Klinik III für Innere Medizin, Universität zu Köln, Joseph-Stelzmann-Str. 9, D-50924 Cologne, Germany  
Center for Molecular Medicine Cologne (CMMC), Universität zu Köln, Germany

Received 2 January 2004; received in revised form 14 April 2004; accepted 26 April 2004

Available online 7 June 2004

Time for primary review 22 days

## Abstract

The renin–angiotensin system (RAS) and transforming growth factor- $\beta_1$  (TGF- $\beta_1$ ) play a pivotal role in the development of cardiac hypertrophy and heart failure. Recent studies indicate that angiotensin II (Ang II) and TGF- $\beta_1$  do not act independently from one another but rather act as part of a signalling network in order to promote cardiac remodeling, which is a key determinant of clinical outcome in heart disease. This review focuses on recent advances in the understanding, how Ang II and TGF- $\beta_1$  are connected in the pathogenesis of cardiac hypertrophy and dysfunction. Increasing evidence suggests that at least some of the Ang II-induced effects on cardiac structure are mediated via indirect actions. Ang II upregulates TGF- $\beta_1$  expression via activation of the angiotensin type 1 (AT<sub>1</sub>) receptor in cardiac myocytes and fibroblasts, and induction of this cytokine is absolutely required for Ang II-induced cardiac hypertrophy *in vivo*. TGF- $\beta$  induces the proliferation of cardiac fibroblasts and their phenotypic conversion to myofibroblasts, the deposition of extracellular matrix (ECM) proteins such as collagen, fibronectin, and proteoglycans, and hypertrophic growth of cardiomyocytes, and thereby mediates Ang II-induced structural remodeling of the ventricular wall in an auto-/paracrine manner. Downstream mediators of cardiac Ang II/TGF- $\beta_1$  networking include Smad proteins, TGF $\beta$ -activated kinase-1 (TAK1), and induction of hypertrophic responsiveness to  $\beta$ -adrenergic stimulation in cardiac myocytes. © 2004 European Society of Cardiology. Published by Elsevier B.V. All rights reserved.

**Keywords:** Cardiac hypertrophy; Heart failure; Angiotensin; TGF- $\beta$ ; Smads;  $\beta$ -Adrenoceptors; Cross-talk

## 1. Introduction

Both the renin–angiotensin system (RAS) and transforming growth factor- $\beta_1$  (TGF- $\beta_1$ ) are key mediators of cardiac adaptations to hemodynamic overload, and are thus critically involved in the pathogenesis of cardiac hypertrophy and failure [1–4]. In situations such as hypertension or chronic myocardial infarction, the heart responds to increased afterload by initiating adaptive remodeling processes. These include cardiomyocyte hypertrophy, fibrosis, extracellular matrix (ECM) deposition, and alterations of cardiac gene expression [5–8]. Although these structural alterations represent the heart's efforts to maintain systolic function, they are deleterious over time and ultimately result

in progressive heart failure [1]. On the molecular level, cardiac remodeling is mediated by activation of several neurohumoral systems including the RAS, TGF- $\beta_1$  and the  $\beta$ -adrenergic system. Recent studies indicate that angiotensin II (Ang II) and TGF- $\beta_1$  do not act independently from one another but rather act as part of a network that promotes cardiac remodeling. This review focuses on recent advances in the understanding, how Ang II and TGF- $\beta_1$  are connected in the pathogenesis of cardiac hypertrophy and failure. Furthermore, possible downstream mediators of the TGF- $\beta_1$ /Ang II-connection are discussed.

## 2. The RAS and TGF- $\beta_1$ are critically involved in the pathogenesis of cardiac hypertrophy and failure

In humans, myocardial hypertrophy due to hemodynamic overload is characterized by increased deposition of ECM constituents, proliferation of cardiac fibroblasts, and hypertrophic growth of cardiac myocytes [5–8]. As a

\* Klinik III für Innere Medizin, Universität zu Köln, Joseph-Stelzmann-Str. 9, D-50924 Cologne, Germany. Tel.: +49-221-478-5159; fax: +49-221-478-6490.

E-mail address: stephan.rosenkranz@medizin.uni-koeln.de (S. Rosenkranz).

consequence of this remodeling process, decreased ventricular compliance contributes to diastolic dysfunction which over time is followed by the development of progressive contractile dysfunction and reentry arrhythmias [1,6]. Both the RAS and TGF- $\beta_1$  are critically involved in the development of cardiac hypertrophy due to pressure overload and the progression from compensated hypertrophy to heart failure.

### 2.1. Renin–angiotensin system

The importance of the RAS in cardiac remodeling and the beneficial effects of its inhibition on cardiac structure, function, and survival are well established. Numerous studies have shown that the RAS is activated in response to hemodynamic overload, and that activation of the (local) RAS contributes to myocardial hypertrophy, fibrosis, and dysfunction [1–3,9–11]. In addition, a large number of animal studies [12–15] and clinical trials in humans [16–24] have shown that inhibition of Ang II by angiotensin converting enzyme (ACE) inhibitors or angiotensin type 1 (AT<sub>1</sub>) receptor antagonists prevents or reverses ventricular remodeling and improves survival in patients with heart failure.

The effector molecule of the RAS, Ang II, directly induces cellular responses in myocardial cells. However, it may activate distinct signaling pathways in cardiac fibroblasts versus cardiomyocytes, which may result in a differential regulation of genes in these two cell types [25]. In cultured cardiac fibroblasts, Ang II stimulates fibroblast proliferation, collagen synthesis, and the expression of ECM proteins such as collagen, fibronectin, and laminin via activation of the AT<sub>1</sub> receptor [26,27]. In cardiac myocytes, Ang II exerts a direct growth-promoting effect only on neonatal cells, whereas it does not strongly promote growth responses in adult cardiomyocytes [28,29]. In addition, Ang II-induced growth of neonatal cells involves the extracellular signal-regulated kinase (Erk) pathway, whereas growth responses induced by other stimuli, i.e.  $\alpha$ -adrenoceptors, do not require Erk activation in adult cardiomyocytes [3,30]. It has therefore been postulated that Ang II may not directly stimulate cardiomyocyte growth and fibrosis in adult myocardium *in vivo*, but may do so indirectly by inducing the expression of growth factors such as TGF- $\beta_1$ , which then act locally via auto-/paracrine mechanisms [31]. Recent studies indicate that this indirect effect may indeed be the major mechanism by which Ang II induces cardiac remodeling [32,33]. For example, Ang II-induced fibronectin mRNA synthesis in cardiac fibroblasts was shown to be mediated by autocrine or paracrine effects of TGF- $\beta_1$  [34].

### 2.2. Transforming growth factor- $\beta_1$

TGF- $\beta_1$  is a locally generated cytokine that has been implicated as a major contributor to tissue fibrosis in

various organ systems [35]. Recent studies in humans and experimental models have shown increased myocardial TGF- $\beta_1$  expression during cardiac hypertrophy and fibrosis. The expression of TGF- $\beta_1$  mRNA is increased in left ventricular myocardium of patients with idiopathic hypertrophic cardiomyopathy and dilated cardiomyopathy [36–38], and in animal models of myocardial infarction, progressive coronary artery occlusion, and pressure overload [39–45]. TGF- $\beta_1$  is particularly expressed in hypertrophic myocardium during the transition from stable hypertrophy to heart failure in experimental models [46] and human heart failure [47], and—in addition to increased collagen content—is thus one of a few markers discriminating between compensated and decompensated cardiac hypertrophy. In the pressure-overloaded human heart, upregulation of ACE and TGF- $\beta_1$  correlated with the degree of fibrosis [48]. *In vitro*, TGF- $\beta_1$  induces the production of ECM components including fibrillar collagen, fibronectin and proteoglycans by cardiac fibroblasts [49–51], stimulates fibroblast proliferation and the phenotypic conversion to myofibroblasts [52–54], and promotes fetal gene expression in cultured neonatal cardiac myocytes [4,55], all hallmarks of cardiac hypertrophy. In addition, TGF- $\beta_1$  self-amplifies its expression in myofibroblasts [56]. Overexpression of TGF- $\beta_1$  in transgenic mice results in cardiac hypertrophy which is characterized by both interstitial fibrosis and hypertrophic growth of cardiac myocytes [57,58], whereas heterozygous TGF- $\beta_1$  (+/–)-deficient mice reveal decreased fibrosis of the aging heart [59]. Finally, functional blockade of TGF- $\beta_1$  signaling *in vivo* by neutralizing antibodies prevents myocardial fibrosis and dysfunction in pressure-overloaded rat hearts [60], and ECM deposition in a model of cardiac hypertrophy induced by long-term blockade of NO synthesis [40].

Taken together, these studies collectively indicate that the RAS and TGF- $\beta_1$  contribute to the pathological cellular events that are responsible for myocardial fibrosis, hypertrophy and dysfunction.

## 3. Evidence for a connection between Ang II and TGF- $\beta_1$ in cardiac tissue

Numerous studies provide indirect evidence for a functional link between Ang II and TGF- $\beta_1$  in the heart. Some studies also indicate that these secreted factors act in an auto-/paracrine manner, and furthermore suggest cross-talk between the various myocardial cell types and compartments such as cardiac myocytes, fibroblasts, ECM, and the vasculature.

*In vitro* studies have shown that TGF- $\beta_1$  mRNA and protein are readily upregulated by Ang II in cardiac fibroblasts, myofibroblasts, and myocytes [31,34,61–67]. Stimulation of human atrial tissue with Ang II also caused a significant increase in TGF- $\beta_1$  mRNA [68],

and chronic administration of Ang II was shown to induce myocardial TGF- $\beta_1$  expression in vivo irrespective of its effects on blood pressure [31,69,70]. Tissue culture experiments revealed that paracrine release of TGF- $\beta_1$  from fibroblasts mediates Ang II-induced cardiac myocyte hypertrophy as blocking antibodies to TGF- $\beta_1$  inhibit myocyte hypertrophy caused by conditioned medium of Ang II-treated fibroblasts [62]. The Ang II-induced upregulation of TGF- $\beta_1$  correlates with cardiac hypertrophy, fibrosis, and re-expression of a fetal cardiac genotype [29,31,62,65,68]. Furthermore, TGF- $\beta_1$  induction preceded the development of myocardial fibrosis and ECM production in various models [40,42,60]. Although Ang II-induced gene expression of ECM may be mediated by the AT $_2$  receptor [71], cardiac hypertrophy and the induction of TGF- $\beta_1$  as well as hypertrophy-associated genes such as atrial natriuretic factor (ANF), which may represent a marker differentiating between physiological and pathophysiological hypertrophy [72–74], have been shown to result from activation of the AT $_1$  receptor [66]. Ang II blockade by an AT $_1$  receptor antagonist reverses both cardiac TGF- $\beta_1$  expression and myocardial hypertrophy/fibrosis in rat models in vivo [31,40,75]. When viewed together, these studies demonstrate a strong correlation between Ang II, TGF- $\beta_1$  induction, and auto-/paracrine cellular responses in cardiac fibroblasts, the myocardial interstitium, and cardiomyocytes, which promote the development of cardiac hypertrophy (Fig. 1).

#### 4. Is there a causal relationship between Ang II, TGF- $\beta_1$ and cardiac hypertrophy?

Although the above studies suggest a functional link between Ang II and TGF- $\beta_1$  in cardiac hypertrophy, a causal relationship has not been proven until recently. In a landmark paper, Schultz et al. [32] tested whether Ang II would be able to induce cardiac hypertrophy and fibrosis in vivo in the absence of TGF- $\beta_1$ . In TGF- $\beta_1^{-/-}$ /Rag1 $^{-/-}$  mice (which were created to overcome the lethal phenotype of TGF- $\beta_1^{-/-}$  mice which is due to an early-onset autoimmune multiorgan inflammatory disease [76]), the lack of the TGF- $\beta_1$  gene fully prevented the development of cardiac hypertrophy and dysfunction induced by subpressor doses of Ang II that was observed in wild type mice (Fig. 2). Disruption of TGF- $\beta_1$  signaling in knockout animals completely abolished the increase in left ventricular mass, the increase in myocyte size, the deterioration in systolic function (fractional shortening), and the induction of ANF [32]. This study provides the first direct evidence that Ang II-induced cardiac hypertrophy is mediated by TGF- $\beta_1$  and confirms the results from other studies which have suggested a functional link between Ang II and TGF- $\beta_1$  in myocardial remodeling in vivo (Table 1). These studies collectively indicate that TGF- $\beta_1$  acts downstream of Ang II and promotes myocyte growth and fibrosis in the heart. This paradigm is further supported by the fact that in mice overexpressing activated TGF- $\beta_1$  (cys<sup>223,225</sup>ser), AT $_1$  receptor blockade with telmisartan is insufficient to prevent

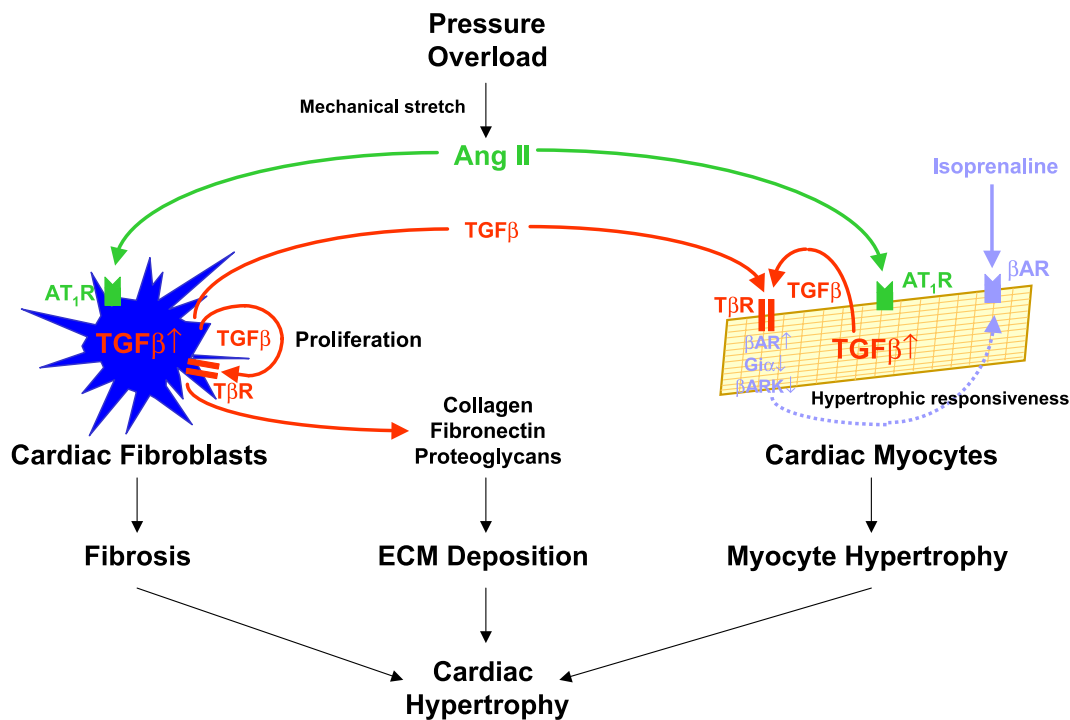

Fig. 1. Schematic diagram illustrating the networking between Ang II and TGF- $\beta_1$  in mediating cardiac hypertrophy via autocrine and paracrine mechanisms. (AT $_1$ R=Angiotensin type 1 receptor; T $\beta$ R=TGF- $\beta$  receptor,  $\beta$ -AR= $\beta$ -adrenergic receptor, ECM=Extracellular matrix,  $\beta$ ARK= $\beta$ -Adrenoreceptor kinase.)

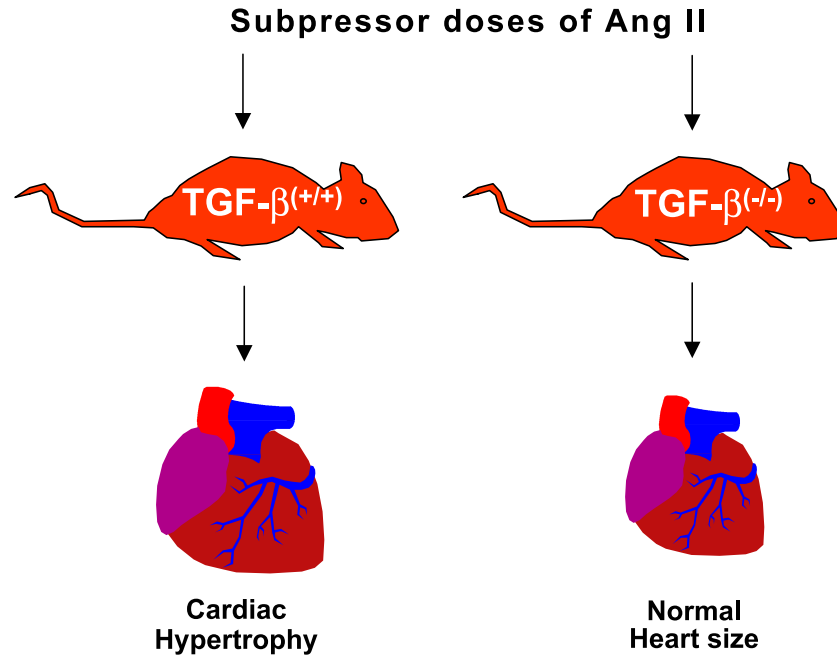

Fig. 2. Causal relationship between Ang II and TGF- $\beta_1$  in cardiac hypertrophy as demonstrated by Schultz et al. [32]. Hypertrophy in response to suppressor doses of Ang II was observed in wild type (TGF- $\beta^{+/+}$ ) but not in TGF- $\beta$ -deficient mice (TGF- $\beta^{-/-}$ ), indicating that TGF- $\beta$  is absolutely required for Ang II-induced cardiac hypertrophy in vivo.

cardiac hypertrophy and dysfunction, whereas disruption of TGF- $\beta_1$  signaling by administration of a TGF- $\beta$  antagonist (sTGF $\beta$ R-Fc) fully prevented the cardiac phenotype in transgenic mice [77]. Furthermore, reduction of TGF- $\beta_1$  mRNA in ventricular tissue was shown to attenuate left ventricular fibrosis and to improve survival of renin-transgenic rats [78].

In summary, Ang II upregulates TGF- $\beta_1$  expression via activation of the AT $_1$  receptor in cardiac myocytes and

fibroblasts, and induction of this cytokine is absolutely required for Ang II-induced cardiac hypertrophy in vivo.

### 5. Molecular mechanisms of TGF- $\beta_1$ induction by angiotensin II

Cardiac hypertrophy and induction of TGF- $\beta_1$  expression are mediated by the Ang II type 1 (AT $_1$ ) receptor in vivo and

Table 1

In vivo studies demonstrating cardiac hypertrophy/fibrosis related to Ang II/TGF- $\beta_1$

| Reference          | Hypertrophic stimulus           | TGF- $\beta$ induction | Cardiac hypertrophy | Myocardial fibrosis | ECM induction  | Prevention of cardiac hypertrophy by |                         |
|--------------------|---------------------------------|------------------------|---------------------|---------------------|----------------|--------------------------------------|-------------------------|
|                    |                                 |                        |                     |                     |                | AT $_1$ R blockade                   | TGF- $\beta$ inhibition |
| Crawford [70]      | Ang II                          | +                      | n.d.                | +                   | +              | +                                    | n.d.                    |
| Everett [66]       | PO                              | +                      | +                   | +                   | n.d.           | +                                    | n.d.                    |
| Kim [69]           | Ang II                          | +                      | +                   | n.d.                | +              | +                                    | n.d.                    |
| Tomita [40]        | NO Blockade                     | +                      | +                   | +                   | +              | +                                    | +                       |
| Nakajima [58]      | TGF- $\beta$                    | +                      | +                   | + <sup>a</sup>      | + <sup>a</sup> | n.d.                                 | n.d.                    |
| Brooks [59]        | TGF- $\beta^{+/-}$ <sup>b</sup> | –                      | n.d.                | ↓                   | ↓              | n.d.                                 | n.d.                    |
| Pinto [78]         | Renin <sup>c</sup>              | +                      | +                   | +                   | +              | n.d.                                 | +                       |
| Zhang [99]         | caTAK1 <sup>d</sup>             | +                      | +                   | +                   | n.d.           | n.d.                                 | n.d.                    |
| Wenzel [31]        | Ang II                          | +                      | +                   | +                   | +              | +                                    | n.d.                    |
| Kuwahara [60]      | PO                              | +                      | +                   | +                   | +              | n.d.                                 | +                       |
| Schultz [32]       | Ang II                          | +                      | +                   | –                   | n.d.           | n.d.                                 | n.d.                    |
| Schultz [32]       | Ang II                          | TGF- $\beta^{-/-}$     | –                   | –                   | –              | n.d.                                 | n.d.                    |
| Rosenkranz [57,77] | TGF- $\beta$                    | +                      | +                   | +                   | +              | –                                    | +                       |
| Tokuda [75]        | PO                              | +                      | +                   | +                   | n.d.           | +                                    | n.d.                    |

PO=Pressure overload; n.d.=not determined.

<sup>a</sup> Only in atrial tissue.

<sup>b</sup> Mice heterozygous for TGF- $\beta$ .

<sup>c</sup> TGR(mRen2)27 transgenic rats.

<sup>d</sup> Constitutively active TGF- $\beta$ -activated kinase-1.

in vitro [31,40,66,79–81]. Downstream of the AT<sub>1</sub> receptor, Ang II induces the activation of signaling cascades that regulate gene expression. It is well established that gene expression is regulated by the specific interaction of nuclear transacting proteins with corresponding *cis*-elements in the regulatory region of genes. A recent study investigating the intracellular signaling events that are required for Ang II-dependent upregulation of TGF- $\beta$ <sub>1</sub> revealed that the induction of TGF- $\beta$ <sub>1</sub> mRNA by Ang II in adult ventricular cardiomyocytes is mediated by NAD(P)H oxidase, and subsequent activation of protein kinase C (PKC), p38-MAP kinase, and nuclear Activating-Protein-1 (AP-1) binding activity [31] (Fig. 3). This is consistent with previous reports demonstrating that the increase of PKC activity observed in cardiac remodeling following myocardial infarction correlates with increased expression of the PKC- $\alpha$ , - $\beta$ , - $\epsilon$ , and - $\zeta$  isozymes [82]. Ang II-induced responses such as regulation of the sarcolemmal Na(+)-K(+) pump are mediated via PKC- $\epsilon$ , whereas TGF- $\beta$ <sub>1</sub>-induced collagen I expression is mediated via Smad3 and PKC- $\delta$  [83,84]. Ang II also induces *c-fos*, which is part of the AP-1 binding complex in cardiac myocytes [29,85]. Furthermore, it was previously shown that the AP-1 complex is involved in Ang II-mediated TGF- $\beta$ <sub>1</sub> induction in smooth muscle cells [86], and Ang II activates AP-1 via transactivation of the epidermal growth factor receptor in cardiac fibroblasts [87]. The fact that Ang II does not induce TGF- $\beta$ <sub>1</sub> expression in the presence of actinomycin D indicates that Ang II regulates TGF- $\beta$ <sub>1</sub> expression at the transcriptional level in cardiac myocytes [31]. Ang II-stimulated upregulation of TGF- $\beta$ <sub>1</sub> mRNA was also shown in cardiac fibroblasts, in which it depends on transactivation of the epidermal growth factor (EGF) receptor and subsequent Erk activation by Ang II [34]. The role of NAD(P)H oxidase in Ang II-mediated TGF- $\beta$ <sub>1</sub> induction and cardiac hypertrophy was recently confirmed in

gp91<sup>phox</sup>-deficient mice, in which the lack of this membranous NAD(P)H oxidase subunit completely prevented Ang II-induced cardiac hypertrophy which was observed in wild type mice [88].

## 6. Downstream mediators of Ang II/TGF $\beta$ <sub>1</sub> in cardiac hypertrophy

Whereas the functional connection between Ang II and TGF- $\beta$ <sub>1</sub> has been well characterized in recent years, only limited information is currently available on how they elicit their cardiac growth responses downstream of TGF- $\beta$  receptors. Recent studies indicate that the downstream mediators of cardiac Ang II/TGF- $\beta$  networking may include Smad proteins, TGF $\beta$ -activated kinase-1 (TAK1), and induction of hypertrophic responsiveness to  $\beta$ -adrenergic stimulation in cardiac myocytes.

### 6.1. TGF- $\beta$ <sub>1</sub> signaling/Smad proteins

TGF- $\beta$ <sub>1</sub> elicits its biological responses through a heteromeric receptor complex comprising two serine–threonine kinase receptors, termed TGF- $\beta$  receptor types 1 and 2 (T $\beta$ R1 and T $\beta$ R2) [89,90]. Both TGF- $\beta$ <sub>1</sub> ligand and the T $\beta$ R1 and T $\beta$ R2 receptors are present in the heart, and all are expressed in cardiac myocytes as well as in non-myocytes [4]. The classical signaling cascade of TGF- $\beta$  receptors involves Smad proteins (R-Smads such as Smad 2 and 3), which are phosphorylated upon receptor activation, associate with Co-Smad (Smad 4) and subsequently translocate to the nucleus where they act as transcription factors [89–91]. Transcriptional control by Smads depends on interactions with other transcription factors, and their association with coactivators or corepressors determines the type of response. Depending on their binding partners, Smads may either activate or inhibit gene transcription [92].

Cardiac remodeling involves changes in Smad expression, and recent studies provide evidence for cross-talk between Ang II and Smads. In a rat model of myocardial infarction, Smads 2, 3, and 4 are upregulated in scar and remnant heart tissue [39,93], whereas Smad 7, an I-Smad which inhibits phosphorylation of R-Smads, is downregulated [94]. AT<sub>1</sub> receptor blockade was shown to attenuate the expression of Smads in this model, since administration of losartan normalized the increased expression of Smad 2 and Smad 4 in infarct scar and remnant tissue [93]. Normalization of Smad expression was associated with a significant reduction in cardiac fibrosis and improvement of myocardial function. Consistently, AT<sub>1</sub> receptor blockade significantly reduced the elevated Smad 2 and Smad 4 expression in cardiomyopathic hamsters, and this effect correlated with decreased fibrosis and expression of fibrillar collagen [95]. In cultured cardiac fibroblasts, Ang II directly promotes TGF- $\beta$ <sub>1</sub>/Smad signaling by elevating Smad 2 levels and inducing the translocation of phosphorylated

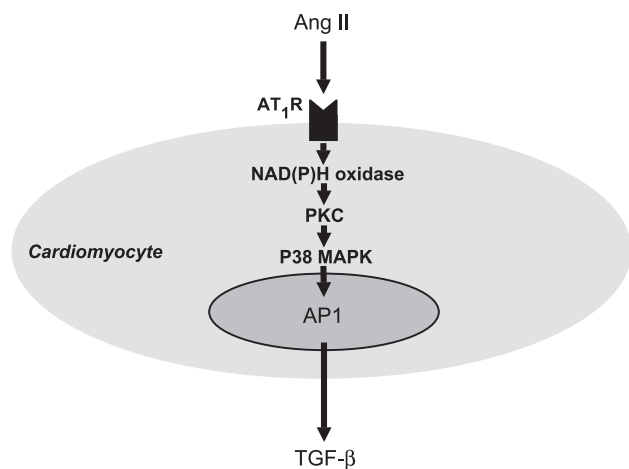

Fig. 3. Signal relay of Ang II-dependent induction of TGF- $\beta$ <sub>1</sub> expression in cardiac myocytes (adapted from Ref. [31]) (AT<sub>1</sub>R=Angiotensin type 1 receptor; PKC=protein kinase C; p38 MAPK=p38 mitogen-activated protein kinase; AP-1=nuclear activating protein-1).

Smad 2 into the nuclei, and these responses also depend on the AT<sub>1</sub> receptor [93]. These studies indicate that cross-talk between Ang II and TGF-β<sub>1</sub> at the postreceptor level (Smad signaling) is associated with fibrosis in cardiac remodeling.

### 6.2. TGF-β-activated kinase-1

TGF-β-activated kinase-1 (TAK1) belongs to the superfamily of mitogen-activated protein kinase kinases (MAPKKK) that couple extracellular stimuli to gene transcription, and has been shown to transduce TGF-β<sub>1</sub> signaling [96]. Together with Smads, TAK1 is involved in cardiomyocyte differentiation and cardiac development via induction of cardiac-restricted transcription factors Csx/Nkx-2.5, GATA-4, and ATF-2 [97,98]. A recent study demonstrated that cardiac hypertrophy and induction of TGF-β<sub>1</sub> after mechanical load by aortic banding were associated with a significant upregulation of TAK1 kinase activity in the mouse heart [99]. TGF-β<sub>1</sub> activates TAK1 in cultured ventricular myocytes, and constitutively activated TAK1 mimicks hypertrophy-associated TGF-β<sub>1</sub> responses such as induction of the skeletal actin (SkA) promoter, signaling to serum response factor (SRF) through p38, and the SRF-associated transcription factor ATF-6 in these cells [99]. Furthermore, overexpression of constitutively active TAK1 at pathophysiological levels in transgenic mice led to cardiac hypertrophy, fibrosis, fetal gene expression, severe myocardial dysfunction and early lethality [99]. Thus, TAK1 is induced in response to mechanical load and may serve as an essential mediator of Ang II/TGF-β<sub>1</sub>-associated cardiac remodeling. Since ATFs bind directly to heterooligomers of Smads and are phosphorylated by TGF-β<sub>1</sub> signaling via TAK1 and p38 [100,101], they are common nuclear targets of the Smad and TAK1 pathways in TGF-β<sub>1</sub> signaling, and thus are good candidates for downstream mediators of Ang II/TGF-β<sub>1</sub>-induced growth responses in the heart.

### 6.3. The β-adrenergic system

Recent studies indicate that β-adrenergic signaling may be involved in the growth responses of the heart by serving as a downstream mediator of Ang II/TGF-β<sub>1</sub> [57,77,102,103]. The detrimental effects of chronic and excessive adrenergic drive have been shown in a number of experimental studies and in man [104–110]. These studies have also shown that the consequences of enhanced β-AR function in the heart are largely dependent on the extent and duration of β-adrenergic overdrive. Stimulation of the sympathetic nervous system is critically involved in the development of myocardial hypertrophy and heart failure particularly by inducing cardiomyocyte hypertrophy [110]. Although the hypertrophic effect of catecholamines on cardiac myocytes in vitro is solely mediated via stimulation of α-adrenoceptors (ARs), myocardial hypertrophy in vivo may also be induced by selective stimulation of β-ARs

[111,112]. Hence, autocrine and/or paracrine mechanisms may alter the responsiveness to β-AR stimulation in vivo. In vitro studies have shown that TGF-β<sub>1</sub> affects β-adrenergic signaling by modulating the number and function of β-ARs in various cell types [113–115]. In transgenic mice overexpressing TGF-β<sub>1</sub>, the hypertrophic cardiac phenotype correlates with alterations of β-adrenergic signaling, which include an increase in myocardial β-AR density and down-regulation of negative regulators such as G<sub>iα</sub> and βARK-1 [57]. This observation is consistent with an in vitro study demonstrating that TGF-β<sub>1</sub> induces hypertrophic responsiveness to β-adrenergic stimulation in cardiac myocytes [102]. In isolated perfused hearts, TGF-β<sub>1</sub> overexpression promotes the isoprenaline-induced expression of hypertrophy-associated proteins including ANF and *c-fos*, and this effect depends specifically on induction of ornithine decarboxylase (ODC), the rate limiting enzyme of the polyamine metabolism [103]. It is interesting to note that chronic β-AR blockade in TGF-β<sub>1</sub> transgenic mice—which display alterations of β-adrenergic signaling—prevents cardiac hypertrophy and the induction of hypertrophic responsiveness to β-

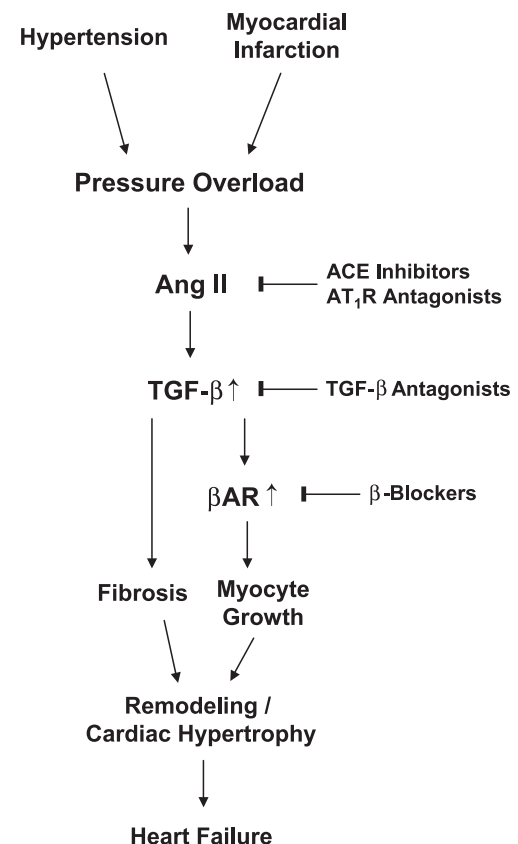

Fig. 4. Schematic diagram illustrating the connection between the RAS, TGF-β<sub>1</sub>, and the β-adrenergic system in cardiac remodeling, and targeting of interventional strategies (AT<sub>1</sub>R = Angiotensin type 1 receptor; β-AR = β-adrenergic receptor, ACE Inhibitors = Angiotensin converting enzyme inhibitors). Note that in addition to the RAS and TGF-β<sub>1</sub>, other systems and mechanisms are also involved in the pathogenesis of myocardial hypertrophy and failure.

adrenergic stimulation, and furthermore improves the diminished functional responsiveness to catecholamines, whereas chronic administration of an AT<sub>1</sub> receptor antagonist did not affect the cardiac phenotype [77]. The latter observation could be expected from previous studies as TGF- $\beta$ <sub>1</sub>, which was induced by Ang II in other models of hypertrophy, is already present in transgenic mice, and AT<sub>1</sub> receptor blockade is expected to be insufficient in this scenario. These data indicate that  $\beta$ -AR-mediated growth responses may act downstream of Ang II/TGF- $\beta$ <sub>1</sub> in cardiac remodeling, and enhancement of  $\beta$ -adrenergic signaling by TGF- $\beta$ <sub>1</sub> may contribute to excessive catecholamine stimulation during the transition from stable hypertrophy to heart failure. Hence, networking between Ang II and TGF- $\beta$ <sub>1</sub> in cardiac hypertrophy may also involve the  $\beta$ -adrenergic system (Fig. 4).

## 7. Conclusions

The RAS and TGF- $\beta$ <sub>1</sub> play an essential role in the progression of cardiac remodeling. There is a large body of evidence that the development of cardiac hypertrophy, fibrosis, and dysfunction is controlled by a regulatory network involving the RAS and TGF- $\beta$ <sub>1</sub> rather than by independent actions of individual players, although other systems and mechanisms are clearly involved [6,11,116]. Ang II induces the expression of TGF- $\beta$ <sub>1</sub> in cardiac myocytes and fibroblasts. TGF- $\beta$ <sub>1</sub> stimulates fibroblast proliferation, ECM deposition, and myocyte hypertrophy via autocrine/paracrine mechanisms, thereby mediating Ang II-induced cardiac remodeling (Fig. 1). In addition to TGF- $\beta$ <sub>1</sub> signaling via Smad proteins and TAK1,  $\beta$ -adrenergic signaling may represent a pathophysiologically important component of this network as TGF- $\beta$ <sub>1</sub> induces hypertrophic responsiveness to  $\beta$ -adrenergic stimulation in cardiac myocytes.

## Acknowledgements

This work was supported in part by the Deutsche Forschungsgemeinschaft (Ro 1306-2), and by the Center for Molecular Medicine (CMMC; Project 84) of the University of Cologne.

## References

- [1] Cohn JN, Ferrari R, Sharpe N. Cardiac remodeling—concepts and clinical implications: a consensus paper from an international forum on cardiac remodeling. Behalf on an international forum on cardiac remodeling. *J Am Coll Cardiol* 2000;35:569–82.
- [2] Schnee JM, Hsueh WA. Angiotensin II, adhesion, and cardiac fibrosis. *Cardiovasc Res* 2000;46:264–8.
- [3] Yamazaki T, Komuro I, Yazaki Y. Role of the renin–angiotensin system in cardiac hypertrophy. *Am J Cardiol* 1999;83:H53–7.
- [4] Brand T, Schneider MD. The TGF $\beta$  superfamily in myocardium: ligands, receptors, transduction, and function. *J Mol Cell Cardiol* 1995;27:5–18.
- [5] Manabe I, Shindo T, Nagai R. Gene expression in fibroblasts and fibrosis: involvement in cardiac hypertrophy. *Circ Res* 2002;91:1103–13.
- [6] Swynghedauw B. Molecular mechanisms of myocardial remodeling. *Physiol Rev* 1999;79:215–62.
- [7] Sudgen PH, Clerk A. Cellular mechanisms of cardiac hypertrophy. *J Mol Med* 1998;76:725–46.
- [8] Parker TG, Schneider MD. Growth factors, protooncogenes, and plasticity of the cardiac phenotype. *Annu Rev Physiol* 1991;53:179–200.
- [9] Ohta K, Kim S, Wanibuchi H, et al. Contribution of the local renin–angiotensin system to cardiac hypertrophy, phenotypic modulation, and remodeling in TGR(mRen2)27 transgenic rats. *Circulation* 1996;94:785–91.
- [10] Pfeffer JM, Fischer TA, Pfeffer MA. Angiotensin converting enzyme inhibition and ventricular remodeling after myocardial infarction. *Annu Rev Physiol* 1995;57:805–26.
- [11] Weber KT, Brilla CG. Pathological hypertrophy and cardiac interstitium: fibrosis and renin–angiotensin–aldosterone system. *Circulation* 1991;83:1849–65.
- [12] Nakamura Y, Yoshiyama M, Omura T, et al. Beneficial effects of combination of ACE inhibitor and angiotensin II type 1 receptor blocker on cardiac remodeling in rat myocardial infarction. *Cardiovasc Res* 2003;57:48–54.
- [13] Kim S, Yoshiyama M, Izumi Y, et al. Effects of combination of ACE inhibitor and angiotensin receptor blocker on cardiac remodeling, cardiac function, and survival in rat heart failure. *Circulation* 2001;103:148–54.
- [14] Liu YH, Yang XP, Sharov VG, et al. Effects of angiotensin converting enzyme inhibitors and angiotensin II type 1 receptor antagonists in rats with heart failure: role of kinins and angiotensin II type 2 receptors. *J Clin Invest* 1997;99:1926–35.
- [15] Schieffer B, Wirger A, Meybrunn M, et al. Comparative effects of chronic angiotensin-converting enzyme inhibition and angiotensin II type 1 receptor blockade on cardiac remodeling after myocardial infarction in the rat. *Circulation* 1994;99:2273–82.
- [16] Pfeffer MA, McMurray JJV, Velazquez EJ, on behalf of the VALIANT Investigators. Valsartan, captopril, or both in myocardial infarction complicated by heart failure, left ventricular dysfunction, or both. *N Engl J Med* 2003;349:1893–906.
- [17] Pfeffer MA, Swedberg K, Granger CB, et al. Effects of candesartan on mortality and morbidity in patients with chronic heart failure: the CHARM-overall programme. *Lancet* 2003;362:759–66.
- [18] McMurray JJV, Östergren J, Swedberg K, et al. Effects of candesartan in patients with chronic heart failure and reduced left ventricular systolic function taking angiotensin-converting enzyme inhibitors: the CHARM-added trial. *Lancet* 2003;362:767–71.
- [19] Cohn JN, Tognoni G. A randomized trial of the angiotensin receptor blocker valsartan in chronic heart failure. *N Engl J Med* 2001;345:1667–75.
- [20] Flather MD, Yusuf S, Kober L, et al. Long-term ACE inhibitor therapy in patients with heart failure or left ventricular dysfunction: a systematic overview of data from individual patients. *Lancet* 2000;355:1575–81.
- [21] Kober L, Torp-Pedersen C, Carlsen JE, et al. A clinical trial of the angiotensin converting enzyme inhibitor trandolapril in patients with left ventricular dysfunction after myocardial infarction. *N Engl J Med* 1995;333:1670–6.
- [22] Pitt B, Poole-Wilson PA, Segal R, et al. Effect of losartan compared with captopril on mortality in patients with symptomatic heart failure: randomised trial—the Losartan Heart Failure Survival Study ELITE II. *Lancet* 2000;355:1582–7.
- [23] The Acute Infarction Ramipril Efficacy (AIRE) Study Investigators. Effect of ramipril on mortality and morbidity of survivors of acute

- myocardial infarction with clinical evidence of heart failure. *Lancet* 1993;342:821–4.
- [24] Pfeffer MA, Braunwald E, Moyé LA, et al. Effect of captopril on mortality and morbidity in patients with left ventricular dysfunction after myocardial infarction: results of the Survival And Ventricular Enlargement (SAVE) trial. *N Engl J Med* 1992;327:669–77.
- [25] Zou Y, Komuro I, Yamazaki T, et al. Cell type-specific angiotensin II-evoked signal transduction pathways: critical roles of G<sub>βγ</sub> subunit, Src family, and Ras in cardiac fibroblasts. *Circ Res* 1998;82:337–45.
- [26] Bouzehrane F, Thibault G. Is angiotensin II a proliferative factor of cardiac fibroblasts? *Cardiovasc Res* 2002;53:304–12.
- [27] Schorb W, Booz GW, Dostal DE, Conrad KM, Chang KC, Baker KM. Angiotensin II is mitogenic in neonatal rat cardiac fibroblasts. *Circ Res* 1993;72:1245–54.
- [28] Wada H, Zile MR, Ivester CT, Cooper IV G, McDermott PJ. Comparative effects of contraction and angiotensin II on growth of adult feline cardiocytes in primary culture. *Am J Physiol* 1996; 271:H29–37.
- [29] Sadoshima J, Izumo S. Molecular characterization of angiotensin II-induced hypertrophy of cardiac myocytes and hyperplasia of cardiac fibroblasts. Critical role of the AT<sub>1</sub> receptor. *Circ Res* 1993;73:413–23.
- [30] Schlüter KD, Simm A, Schäfer M, Taimor G, Piper HM. Early response kinase and PI 3-kinase activation in adult cardiomyocytes and their role in hypertrophy. *Am J Physiol* 1999;276:H1655–63.
- [31] Wenzel S, Taimor G, Piper HM, Schlüter KD. Redox-sensitive intermediates mediate angiotensin II-induced p38 MAP kinase activation, AP-1 binding activity, and TGF-β expression in adult ventricular cardiomyocytes. *FASEB J* 2001;15:2291–3.
- [32] Schultz JEJ, Witt SA, Glascock BJ, et al. TGF-β1 mediates the hypertrophic cardiomyocyte growth induced by angiotensin II. *J Clin Invest* 2002;109:787–96.
- [33] Dostal DE. Regulation of cardiac collagen: angiotensin and cross-talk with local growth factors. *Hypertension* 2001;37:841–4.
- [34] Moriguchi Y, Matsubara H, Mori Y, et al. Angiotensin II-induced transactivation of epidermal growth factor receptor regulates fibronectin and transforming growth factor-beta synthesis via transcriptional and posttranscriptional mechanisms. *Circ Res* 1999;84: 1073–84.
- [35] Border WA, Nobel NA. Transforming growth factor-β in tissue fibrosis. *N Engl J Med* 1994;331:1286–92.
- [36] Pauschinger M, Knopf D, Petschauer S, et al. Dilated cardiomyopathy is associated with significant changes in collagen type I/III ratio. *Circulation* 1999;99:2750–6.
- [37] Li G, Li RK, Mickle DA, et al. Elevated insulin-like growth factor-I and transforming growth factor-beta 1 and their receptors in patients with idiopathic hypertrophic cardiomyopathy: a possible mechanism. *Circulation* 1998;98(Suppl. 19):II-144–9.
- [38] Li RK, Mickle DA, Weisel RD, et al. Overexpression of transforming growth factor-beta 1 and insulin-like growth factor-I in patients with idiopathic hypertrophic cardiomyopathy. *Circulation* 1997;96: 874–81.
- [39] Hao J, Ju H, Zhao S, Junaid A, Scammell-La Fleur T, Dixon MC. Elevation of expression of Smads 2, 3, and 4, decorin and TGF-β in the chronic phase of myocardial infarct scar healing. *J Mol Cell Cardiol* 1999;31:667–78.
- [40] Tomita H, Egashira K, Ohara Y, et al. Early induction of transforming growth factor-beta via angiotensin II type 1 receptors contributes to cardiac fibrosis induced by long-term blockade of nitric oxide synthesis in rats. *Hypertension* 1998;32:273–9.
- [41] Takahashi N, Calderone A, Izzo JN, et al. Hypertrophic stimuli induce transforming growth factor-β1 expression in rat ventricular myocytes. *J Clin Invest* 1994;94:1470–6.
- [42] Villarreal FK, Dillmann WH. Cardiac hypertrophy-induced changes in mRNA levels for TGF-beta 1, fibronectin and collagen. *Am J Physiol* 1992;262:H1861–6.
- [43] Wünsch M, Sharma HS, Markert T, et al. In situ localization of transforming growth factor beta 1 in porcine heart: enhanced expression after chronic coronary artery occlusion. *J Mol Cell Cardiol* 1991;23:1051–62.
- [44] Casscells W, Bazoberry F, Speir E, et al. Transforming growth factor-β1 in normal heart and in myocardial infarction. *Ann N Y Acad Sci* 1990;593:148–60.
- [45] Thompson NL, Bazoberry F, Speir EH, et al. Transforming growth factor beta-1 in acute myocardial infarction in rats. *Growth Factors* 1988;1:91–9.
- [46] Bolyut MO, O'Neill L, Meredith AL, et al. Alterations in cardiac gene expression during the transition from stable hypertrophy to heart failure: marked upregulation of genes encoding extracellular matrix components. *Circ Res* 1994;75:23–32.
- [47] Song H, Foster AH, Conte JV, Chi-Ming W. Presentation and localization of transforming growth factor beta isoforms and its receptor subtypes in human myocardium in the absence and presence of heart failure. *Circulation* 1997;96(Suppl. I):I-362.
- [48] Hein S, Aron E, Kostin S, et al. Progression from compensated hypertrophy to failure in the pressure-overloaded human heart. Structural deterioration and compensatory mechanisms. *Circulation* 2003;107:984–91.
- [49] Villarreal FJ, Lee AA, Dillmann WH, Giordano FJ. Adenovirus-mediated overexpression of human transforming growth factor-beta 1 in rat cardiac fibroblasts, myocytes and smooth muscle cells. *J Mol Cell Cardiol* 1996;28:735–42.
- [50] Heimer R, Bashey RI, Kyle J, Jimenez SA. TGF-beta modulates the synthesis of proteoglycans by myocardial fibroblasts in culture. *J Mol Cell Cardiol* 1995;27:2191–8.
- [51] Eghbali M, Tomek R, Sukhatme VP, Woods C, Bhambi B. Differential effects of transforming growth factor-beta 1 and phorbol myristate acetate on cardiac fibroblasts: regulation of fibrillar collagen mRNAs and expression of early transcription factors. *Circ Res* 1991;69:483–90.
- [52] Tomasek JJ, Gabbiani G, Hinz B, Chaponnier C, Brown RA. Myofibroblasts and mechano-regulation of connective tissue remodeling. *Nat Rev Mol Cell Biol* 2002;3:349–63.
- [53] Hautmann MB, Adam PJ, Owens GK. Similarities and differences in smooth muscle α-actin induction by TGF-β in smooth muscle versus non-smooth muscle cells. *Arterioscler Thromb Vasc Biol* 1999;19: 2049–58.
- [54] Sappino AP, Schürch W, Gabbiani G. Differentiation repertoire of fibroblastic cells: expression of cytoskeletal proteins as markers of phenotypic modulations. *Lab Invest* 1990;63:144–61.
- [55] Parker TG, Packer SE, Schneider MD. Peptide growth factors can provoke “fetal” contractile protein gene expression in rat cardiac myocytes. *J Clin Invest* 1990;85:507–14.
- [56] Desmoulière A, Geinoz A, Gabbiani F, et al. Transforming growth factor-β1 induces α-smooth muscle actin expression in granulation tissue myofibroblasts and in quiescent and growing cultured fibroblasts. *J Biol Chem* 1993;122:103–11.
- [57] Rosenkranz S, Flesch M, Amann K, et al. Alterations of β-adrenergic signaling and cardiac hypertrophy in transgenic mice overexpressing TGF-β1. *Am J Physiol Heart Circ Physiol* 2002; H1253–62.
- [58] Nakajima H, Nakajima HO, Salcher O, et al. Atrial but not ventricular fibrosis in mice expressing a mutant transforming growth factor-β1 transgene in the heart. *Circ Res* 2000;86:571–9.
- [59] Brooks WW, Conrad CH. Myocardial fibrosis in transforming growth factor heterozygous mice. *J Mol Cell Cardiol* 2000;32: 187–95.
- [60] Kuwahara F, Kai H, Tokuda K, et al. Transforming growth factor-β function blocking prevents myocardial fibrosis and diastolic dysfunction in pressure-overloaded rats. *Circulation* 2002;106:130–5.
- [61] van Wamel AJ, Ruwof C, van der Valk-Kokshoorn LJM, Schrier A, van der Laarse A. Stretch-induced paracrine hypertrophic stimuli increase TGF-β1 expression in cardiomyocytes. *Mol Cell Biochem* 2002;236:147–53.



- [62] Gray MO, Long CS, Kalinyak JE, Li HT, Karliner JS. Angiotensin II stimulates cardiac myocyte hypertrophy via paracrine release of TGF-beta 1 and endothelin-1 from fibroblasts. *Cardiovasc Res* 1998;40:352–63.
- [63] Campbell SE, Katwa LC. Angiotensin II stimulated expression of transforming growth factor-beta 1 in cardiac fibroblasts and myofibroblasts. *J Mol Cell Cardiol* 1997;29:1947–58.
- [64] Fisher SA, Absher M. Norepinephrine and angiotensin II stimulate secretion of TGF-beta by neonatal rat cardiac fibroblasts in vitro. *Am J Physiol* 1995;268:C910–7.
- [65] Lee AA, Dillmann WH, McCulloch AD, Villarreal FJ. Angiotensin II stimulates the autocrine production of transforming growth factor-beta 1 in adult rat cardiac fibroblasts. *J Mol Cell Cardiol* 1995;27:2347–57.
- [66] Everett AD, Tufro-McReddie A, Fisher A, Gomez RA. Angiotensin receptor regulates cardiac hypertrophy and transforming growth factor-beta 1 expression. *Hypertension* 1994;23:587–92.
- [67] Sadoshima J, Xu YH, Slayter HS, Izumo S. Autocrine release of angiotensin-II mediates stretch-induced hypertrophy of cardiac myocytes in vitro. *Cell* 1993;75:977–84.
- [68] Kupfahl C, Pink D, Friedrich K, et al. Angiotensin II directly increases transforming growth factor beta 1 and osteopontin and indirectly affects collagen mRNA expression in the human heart. *Cardiovasc Res* 2000;46:463–75.
- [69] Kim S, Ohta K, Hamaguchi A, et al. Angiotensin II type I receptor antagonist inhibits the gene expression of TGF- $\beta$ 1 and extracellular matrix in cardiac and vascular tissues of hypertensive rats. *J Pharmacol Exp Ther* 1995;273:509–15.
- [70] Crawford D, Chobanian A, Brecher P. Angiotensin II induces fibronectin expression associated with cardiac fibrosis in the rat. *Circ Res* 1994;74:727–39.
- [71] Ichihara S, Senbonmatsu T, Price Jr E, et al. Angiotensin type 2 receptor is essential for left ventricular hypertrophy and cardiac fibrosis in chronic angiotensin II-induced hypertension. *Circulation* 2001;104:346–51.
- [72] Calderone A, Murphy RJ, Lavoie J, Colombo F, Beliveau L. TGF-beta(1) and prepro-ANP mRNAs are differentially regulated in exercise-induced cardiac hypertrophy. *J Appl Physiol* 2001;91:771–6.
- [73] Silberbach M, Roberts Jr CT. Natriuretic peptide signaling: molecular and cellular pathways to growth regulation. *Cell Signal* 2001;13:221–31.
- [74] Buttrick PM, Kaplan M, Leinwand LA, Scheuer J. Alterations in gene expression in the rat heart after chronic pathological and physiological loads. *J Mol Cell Cardiol* 1994;26:61–7.
- [75] Tokuda K, Kai H, Kuwahara F, et al. Pressure-independent effects of angiotensin II on hypertensive myocardial fibrosis. *Hypertension* 2004;43:499–503.
- [76] Diebold RJ, Eis MJ, Yin M, et al. Early-onset multifocal inflammation in the transforming growth factor- $\beta$  1-null mouse is lymphocyte mediated. *Proc Natl Acad Sci USA* 1995;92:12215–29.
- [77] Rosenkranz S, Amann K, Caglayan E, et al.  $\beta$ -adrenoceptor blockade prevents cardiac hypertrophy and failure in TGF- $\beta$  transgenic mice. *Eur J Heart* 2003;24:665 [Suppl. (Abstract)].
- [78] Pinto YM, Pinto-Sietsma SJ, Philipp T, et al. Reduction in left ventricular messenger RNA for transforming growth factor beta(1) attenuates left ventricular fibrosis and improves survival without lowering blood pressure in the hypertensive TGR(mRen2)27 rat. *Hypertension* 2000;36:747–54.
- [79] Nishikawa K. Angiotensin AT<sub>1</sub> receptor antagonism and protection against cardiovascular end organ damage. *J Hum Hypertens* 1998;12:301–9.
- [80] Sun Y, Zhang JQ, Zhang J, Ramires FJ. Angiotensin II, transforming growth factor- $\beta$ <sub>1</sub> and repair in the infarcted heart. *J Mol Cell Cardiol* 1998;30:1559–69.
- [81] Kim S, Ohta K, Hamaguchi A, Yukimura T, Miura K, Iwao H. Effects of an AT<sub>1</sub> receptor antagonist, an ACE inhibitor and a calcium channel antagonist on cardiac gene expression in hypertensive rats. *Br J Pharmacol* 1996;118:549–56.
- [82] Wang J, Liu X, Sentex E, Takeda N, Dhalla NS. Increased expression of protein kinase C isoforms in heart failure due to myocardial infarction. *Am J Physiol Heart Circ Physiol* 2003;284:H2277–87.
- [83] Buhagiar KA, Hansen PS, Bewick NL, Rasmussen HH. Protein kinase C-epsilon contributes to regulation of the sarcolemmal Na(+)-K(+) pump. *Am J Physiol Cell Physiol* 2001;281:C1059–63.
- [84] Runyan CE, Schnaper HW, Poncelet AC. Smad 3 and PKCdelta mediate TGF-beta1-induced collagen I expression in human mesangial cells. *Am J Physiol Renal Physiol* 2003;285:F413–22.
- [85] Kojima M, Shiojima I, Yamazaki T, et al. Angiotensin II receptor antagonist TCV-116 induces regression of hypertensive left ventricular hypertrophy in vivo and inhibits the intracellular signalling pathway of stretch-mediated cardiomyocyte hypertrophy in vitro. *Circulation* 1994;89:2204–11.
- [86] Morishita R, Gibbons GH, Horiuchi M, Kaneda Y, Ogihara T, Dzau VJ. Role of the AP-1 complex in angiotensin II-mediated TGF- $\beta$  expression and growth of smooth muscle cells: using decoy approach against AP-1 binding. *Biochem Biophys Res Commun* 1998;243:361–7.
- [87] Puri PL, Avantiaggiati ML, Bugio VL, et al. Reactive oxygen intermediates mediate angiotensin II-induced c-fos/c-jun heterodimer DNA binding activity and proliferative hypertrophic response in myogenic cells. *J Biol Chem* 1995;270:22129–34.
- [88] Byrne JA, Grieve DJ, Bendall JK, et al. Contrasting roles of NADPH oxidase isoforms in pressure-overload versus angiotensin II-induced cardiac hypertrophy. *Circ Res* 2003;93:802–4.
- [89] Massague J. How cells read TGF- $\beta$  signals. *Nat Rev Mol Cell Biol* 2000;1:169–78.
- [90] Massague J. TGF- $\beta$  signaling: receptors, transducers, and mad proteins. *Cell* 1996;85:947–50.
- [91] Moustakas A, Souchelnytskyi S, Heldin C-H. Smad regulation in TGF- $\beta$  signal transduction. *J Cell Sci* 2001;114:4359–69.
- [92] Ng HH, Bird A. Histone deacetylases: silencers for hire. *Trends Biochem Sci* 2000;25:121–6.
- [93] Hao J, Wang B, Jones SC, Jassal DS, Dixon IMC. Interaction between angiotensin II and Smad proteins in fibroblasts in failing heart and in vitro. *Am J Physiol Heart Circ Physiol* 2000;279:H3020–30.
- [94] Wang B, Hao J, Jones SC, Yee MS, Roth JC, Dixon IM. Decreased Smad 7 expression contributes to cardiac fibrosis in the infarcted rat heart. *Am J Physiol Heart Circ Physiol* 2002;282:H1685–96.
- [95] Dixon IM, Hao J, Reid NL, Roth JC. Effect of chronic AT(1) receptor blockade on cardiac Smad overexpression in hereditary cardiomyopathic hamsters. *Cardiovasc Res* 2000;46:286–97.
- [96] Yamaguchi K, Shirakabe H, Shibuya H, et al. Identification of a member of the MAPKKK family as a potential mediator of TGF- $\beta$  signal transduction. *Science* 1995;270:2008–11.
- [97] Monzen K, Hiroi Y, Kudoh S, et al. Smads, TAK1, and their common target ATF-2 play a critical role in cardiomyocyte differentiation. *J Cell Biol* 2001;153:687–98.
- [98] Monzen K, Shiojima I, Hiroi Y, et al. Bone morphogenic proteins induce cardiomyocyte differentiation through the mitogen-activated protein kinase kinase kinase TAK1 and cardiac transcription factors Csx/Nkx-2.5 and GATA4. *Mol Cell Biol* 1999;19:7096–105.
- [99] Zhang D, Gaussin V, Taffet GE, et al. TAK1 is activated in the myocardium after pressure overload and is sufficient to provoke heart failure in transgenic mice. *Nat Med* 2000;6:556–63.
- [100] Hanafusa H, Ninomiya-Tsuji J, Masuyama N, et al. Involvement of the p38 mitogen-activated protein kinase pathway in transforming growth factor- $\beta$ -induced gene expression. *J Biol Chem* 1999;274:27161–7.
- [101] Sano Y, Harada J, Tashiro S, Gotoh-Mandeville R, Maekawa T, Ishii S. ATF-2 is a common nuclear target of Smad and TAK1 pathways in transforming growth factor- $\beta$  signaling. *J Biol Chem* 1999;274:8949–57.

- [102] Schlüter K-D, Zhou XJ, Piper HM. Induction of hypertrophic responsiveness to isoproterenol by TGF- $\beta$  in adult rat cardiomyocytes. *Am J Physiol* 1995;269:C1311–6.
- [103] Schlüter K-D, Frischkopf K, Flesch M, Rosenkranz S, Taimor G, Piper HM. Central role for ornithine decarboxylase in  $\beta$ -adrenoceptor mediated hypertrophy. *Cardiovasc Res* 2000;45:410–7.
- [104] Liggett SB, Tepe NM, Lorenz JN, et al. Early and delayed consequences of  $\beta_2$ -adrenergic receptor overexpression in mouse hearts. Critical role for expression level. *Circulation* 2000;101:1707–14.
- [105] Engelhardt S, Hein L, Wiesmann F, Lohse MJ. Progressive hypertrophy and heart failure in beta 1-adrenergic receptor transgenic mice. *Proc Natl Acad Sci USA* 1999;96:7059–64.
- [106] Gao MH, Lai NC, Roth DM, et al. Adenylyl cyclase increases responsiveness to catecholamine stimulation in transgenic mice. *Circulation* 1999;99:1618–22.
- [107] Iwase M, Uechi M, Vatner DE, et al. Cardiomyopathy induced by cardiac Gs alpha overexpression. *Am J Physiol* 1997;272:H585–9.
- [108] Milano CA, Allen LF, Rockman HA, et al. Enhanced myocardial function in transgenic mice overexpressing the  $\beta_2$ -adrenergic receptor. *Science* 1994;264:582–6.
- [109] Koch WJ, Rockman HA, Samama P, et al. Cardiac function in mice overexpressing the  $\beta$ -adrenergic receptor kinase or a  $\beta$ ARK inhibitor. *Science* 1995;268:1350–3.
- [110] Böhm M, Kouchi I, Schnabel P, Zolk O. Transition from hypertrophy to failure- $\beta$ -adrenergic desensitization of the heart. *Heart Failure Rev* 1999;4:329–51.
- [111] Simpson P, McGrath A. Norepinephrine-stimulated hypertrophy of cultured rat myocardial cells is an  $\alpha_1$ -adrenergic response. *J Clin Invest* 1983;72:732–8.
- [112] Bartolome J, Guguenard J, Slotkin TA. Role of ornithine decarboxylase in cardiac growth and hypertrophy. *Science* 1990;210:793–4.
- [113] Kimura M, Ogihara M. Transforming growth factor-beta 1 inhibits the growth of primary hepatocyte cultures by increasing cAMP levels. *Eur J Pharmacol* 1999;386:271–7.
- [114] Iizuka K, Sano H, Kawaguchi H, Kitabatake A. Transforming growth factor  $\beta$ -1 modulates the number of  $\beta$ -adrenergic receptors in cardiac fibroblasts. *J Mol Cell Cardiol* 1994;26:435–40.
- [115] Nogami M, Romberger DJ, Rennard SI, Toews ML. TGF- $\beta_1$  modulates  $\beta$ -adrenergic receptor number and function in cultured human tracheal smooth muscle cells. *Am J Physiol* 1994;266:L187–91.
- [116] Weber KT, Brilla CG, Janicki JS. Myocardial fibrosis: its functional significance and regulatory factors. *Cardiovasc Res* 1993;27:341–8.
